# Supplementary material
Source: PubMed Central journal article supplement (PMC5801475)
Supplement: EHP1265.s001.acco.pdf [file EHP1265.s001.acco.pdf]

**Note to readers with disabilities:** *EHP* strives to ensure that all journal content is accessible to all readers. However, some figures and Supplemental Material published in *EHP* articles may not conform to [508 standards](#) due to the complexity of the information being presented. If you need assistance accessing journal content, please contact [ehp508@niehs.nih.gov](mailto:ehp508@niehs.nih.gov). Our staff will work with you to assess and meet your accessibility needs within 3 working days.

### **Supplemental Material**

#### **A Method for Identifying Prevalent Chemical Combinations in the U.S. Population**

Dustin F. Kapraun, John F. Wambaugh, Rogelio Tornero-Velez, R. Woodrow Setzer

**DISCLAIMER:** The views expressed in this supplemental material are those of the authors and do not necessarily represent the views or policies of the US Environmental Protection Agency.

#### **Table of Contents**

##### **Description of Tables S1 through S3.**

**Table S1.** Listing of Group A chemicals from NHANES 2009-2010.

**Table S2.** Listing of Group B chemicals from NHANES 2009-2010.

**Table S3.** Listing of Group C chemicals from NHANES 2009-2010.

##### **Description of Tables S4 through S6.**

**Table S4.** Listing of concordance percentages between sets of prevalent combinations obtained using the entire subsample A from NHANES 2009-2010 or partitions thereof.

**Table S5.** Listing of concordance percentages between sets of prevalent combinations obtained using the entire subsample B from NHANES 2009-2010 or partitions thereof.

**Table S6.** Listing of concordance percentages between sets of prevalent combinations obtained using the entire subsample C from NHANES 2009-2010 or partitions thereof.

**Figure S1.** Presence-absence map (black indicates present) illustrating 33 maximal prevalent combinations of Group C chemicals from Subgroups C1, C2, and C4.

#### **REFERENCES**

##### **Additional Files.**

- EHP\_Scripts\_revised.zip: Supplemental Python script and relevant data files.

**Description of Tables S1 through S3.** Tables S1, S2, and S3 provide information on NHANES 2009-2010 chemicals from Groups A, B, and C, respectively. From left to right, the columns in this table are:

- “NHANES Code”, the label used by NHANES to identify the concentration of a given chemical measured in the urine or serum of subjects;
- “DSSTox RID”, the source record identifier for the chemical in the DSSTox database (US Environmental Protection Agency 2016a);
- “DSSTox SID”, the generic substance identifier for the chemical in the DSSTox database;
- “NHANES Chemical Name”, the name given for the chemical in the NHANES 2009-2010 documentation;
- “CASN”, a Chemical Abstract Service Registry Number corresponding to the chemical;
- “NHANES File”, the name of the NHANES SAS transport (XPT) file that contains concentration information for the chemical; and
- “Proportion > Median”, the estimated proportion of US residents (based on subject weights) in which the chemical concentration is greater than the median concentration.

One can find detailed information on any chemical listed in these tables by entering the relevant DSSTox SID into the CompTox Dashboard search engine (US Environmental Protection Agency 2016b).

**Table S1.** Listing of Group A chemicals from NHANES 2009-2010.

| NHANES Code | DSSTox RID      | DSSTox SID     | NHANES Chemical Name   | CASN       | NHANES File | Proportion > Median |
|-------------|-----------------|----------------|------------------------|------------|-------------|---------------------|
| URXUSB      | DTXRID802675623 | DTXSID5023879  | Antimony               | 7440-36-0  | UHM_F       | 0.499841            |
| URXUBA      | DTXRID502675624 | DTXSID8023894  | Barium                 | 7440-39-3  | UHM_F       | 0.499944            |
| URXUBE      | DTXRID202675625 | DTXSID4023913  | Beryllium              | 7440-41-7  | UHM_F       | 0                   |
| URXUCD      | DTXRID902675626 | DTXSID1023940  | Cadmium                | 7440-43-9  | UHM_F       | 0.499799            |
| URXUCS      | DTXRID602675627 | DTXSID5036767  | Cesium                 | 7440-46-2  | UHM_F       | 0.499647            |
| URXUCO      | DTXRID302675628 | DTXSID1031040  | Cobalt                 | 7440-48-4  | UHM_F       | 0.499281            |
| URXUPB      | DTXRID002675629 | DTXSID2024161  | Lead                   | 7439-92-1  | UHM_F       | 0.49821             |
| URXUMO      | DTXRID302675630 | DTXSID1024207  | Molybdenum             | 7439-98-7  | UHM_F       | 0.499482            |
| URXUPT      | DTXRID002675631 | DTXSID9064681  | Platinum               | 7440-06-4  | UHM_F       | 0.118602            |
| URXUTL      | DTXRID702675632 | DTXSID2036035  | Thallium               | 7440-28-0  | UHM_F       | 0.499981            |
| URXUTU      | DTXRID402675633 | DTXSID8052481  | Tungsten               | 7440-33-7  | UHM_F       | 0.499485            |
| URXUUR      | DTXRID102675634 | DTXSID1042522  | Uranium                | 7440-61-1  | UHM_F       | 0.499603            |
| URXUAS      | DTXRID702675606 | DTXSID4023886  | Arsenic                | 7440-38-2  | UAS_F       | 0.499925            |
| URXUAS5     | DTXRID402675607 | DTXSID1034341  | Arsenic (V) acid       | 7778-39-4  | UAS_F       | 0.023311            |
| URXUAB      | DTXRID102675608 | DTXSID0052833  | Arsenobetaine          | 64436-13-1 | UAS_F       | 0.499981            |
| URXUAC      | DTXRID802675609 | DTXSID80873153 | Arsenocholine          | 39895-81-3 | UAS_F       | 0.022656            |
| URXUAS3     | DTXRID102675610 | DTXSID7074828  | Arsenous (III) acid    | 13464-58-9 | UAS_F       | 0.044339            |
| URXUDMA     | DTXRID802675611 | DTXSID7020508  | Dimethylarsonic acid   | 75-60-5    | UAS_F       | 0.499605            |
| URXUMMA     | DTXRID502675612 | DTXSID4020903  | Monomethylarsonic acid | 124-58-3   | UAS_F       | 0.305048            |
| URXUTM      | DTXRID202675613 | DTXSID1021401  | Trimethylarsine oxide  | 4964-14-1  | UAS_F       | 0.006581            |
| URXNO3      | DTXRID902675614 | DTXSID5024217  | Nitrate                | 14797-55-8 | PERNT_F     | 0.499838            |
| URXUP8      | DTXRID602675615 | DTXSID6024252  | Perchlorate            | 14797-73-0 | PERNT_F     | 0.49903             |
| URXSCN      | DTXRID302675616 | DTXSID8047763  | Thiocyanate            | 302-04-5   | PERNT_F     | 0.499518            |
| URXDAZ      | DTXRID002675617 | DTXSID9022310  | Daidzein               | 486-66-8   | PHYTO_F     | 0.499496            |
| URXETD      | DTXRID702675618 | DTXSID0047876  | Enterodiol             | 80226-00-2 | PHYTO_F     | 0.499773            |
| URXETL      | DTXRID402675619 | DTXSID0048183  | Enterolactone          | 78473-71-9 | PHYTO_F     | 0.499854            |
| URXEQU      | DTXRID702675620 | DTXSID7058705  | Equol                  | 94105-90-5 | PHYTO_F     | 0.499887            |
| URXGNS      | DTXRID402675621 | DTXSID5022308  | Genistein              | 446-72-0   | PHYTO_F     | 0.499779            |
| URXDMA      | DTXRID102675622 | DTXSID40873154 | O-Desmethylangolensin  | 21255-69-6 | PHYTO_F     | 0.498984            |

**Table S2.** Listing of Group B chemicals from NHANES 2009-2010.

| NHANES Code | DSSTox RID      | DSSTox SID     | NHANES Chemical Name                     | CASN         | NHANES File | Proportion > Median |
|-------------|-----------------|----------------|------------------------------------------|--------------|-------------|---------------------|
| URXBP3      | DTXRID802675635 | DTXSID3022405  | Benzophenone-3                           | 131-57-7     | EPH_F       | 0.499568            |
| URXBPH      | DTXRID502675636 | DTXSID7020182  | Bisphenol A                              | 80-05-7      | EPH_F       | 0.499183            |
| URX4TO      | DTXRID202675637 | DTXSID9022360  | 4-tert-Octylphenol                       | 140-66-9     | EPH_F       | 0.111579            |
| URXTRS      | DTXRID902675638 | DTXSID5032498  | Triclosan                                | 3380-34-5    | EPH_F       | 0.499997            |
| URXBUP      | DTXRID602675639 | DTXSID3020209  | Butyl paraben                            | 94-26-8      | EPH_F       | 0.385113            |
| URXEPB      | DTXRID902675640 | DTXSID9022528  | Ethyl paraben                            | 120-47-8     | EPH_F       | 0.49988             |
| URXMPB      | DTXRID602675641 | DTXSID4022529  | Methyl paraben                           | 99-76-3      | EPH_F       | 0.499836            |
| URXPPB      | DTXRID302675642 | DTXSID4022527  | n-Propyl paraben                         | 94-13-3      | EPH_F       | 0.498906            |
| URXOPP      | DTXRID002675643 | DTXSID2021151  | ortho-Phenylphenol                       | 90-43-7      | PP_F        | 0.213037            |
| URX1TB      | DTXRID702675644 | DTXSID4024359  | 2,4,5-Trichlorophenol                    | 95-95-4      | PP_F        | 0.248461            |
| URX3TB      | DTXRID402675645 | DTXSID5021386  | 2,4,6-Trichlorophenol                    | 88-06-2      | PP_F        | 0.251625            |
| URXDCB      | DTXRID102675646 | DTXSID1020439  | 2,4-Dichlorophenol                       | 120-83-2     | PP_F        | 0.499796            |
| URX14D      | DTXRID802675647 | DTXSID7025003  | 2,5-Dichlorophenol                       | 583-78-8     | PP_F        | 0.499518            |
| URXMZP      | DTXRID502675648 | DTXSID9043938  | Mono-benzyl phthalate                    | 2528-16-7    | PHTHTE_F    | 0.499746            |
| URXMIB      | DTXRID202675649 | DTXSID5052701  | Mono-isobutyl phthalate                  | 30833-53-5   | PHTHTE_F    | 0.499786            |
| URXMBP      | DTXRID502675650 | DTXSID4040002  | Mono-n-butyl phthalate                   | 131-70-4     | PHTHTE_F    | 0.49988             |
| URXMCP      | DTXRID202675651 | DTXSID3052729  | Mono-cyclohexyl phthalate                | 7517-36-4    | PHTHTE_F    | 0.044604            |
| URXMEP      | DTXRID902675652 | DTXSID3052696  | Mono-ethyl phthalate                     | 2306-33-4    | PHTHTE_F    | 0.499813            |
| URXMHP      | DTXRID602675653 | DTXSID2025680  | Mono-2-ethylhexyl phthalate              | 4376-20-9    | PHTHTE_F    | 0.499816            |
| URXMHH      | DTXRID302675654 | DTXSID50873160 | Mono-(2-ethyl-5-hydroxyhexyl) phthalate  | 40321-99-1   | PHTHTE_F    | 0.499549            |
| URXMOH      | DTXRID002675655 | DTXSID00865994 | Mono-(2-ethyl-5-oxohexyl) phthalate      | 40321-98-0   | PHTHTE_F    | 0.499876            |
| URXECP      | DTXRID702675656 | DTXSID20873152 | Mono-(2-ethyl-5-carboxypentyl) phthalate | 40809-41-4   | PHTHTE_F    | 0.499757            |
| URXCNP      | DTXRID402675657 | DTXSID60873156 | Mono-(carboxynonyl) phthalate            | 1373125-93-9 | PHTHTE_F    | 0.499901            |
| URXMNP      | DTXRID102675658 | DTXSID20873157 | Mono-isononyl phthalate                  | 519056-28-1  | PHTHTE_F    | 0.391561            |
| URXCOP      | DTXRID802675659 | DTXSID00873155 | Mono-(carboxyoctyl) phthalate            | 1923895-92-4 | PHTHTE_F    | 0.499889            |
| URXMNM      | DTXRID102675660 | DTXSID9040001  | Mono-methyl phthalate                    | 4376-18-5    | PHTHTE_F    | 0.499155            |
| URXMC1      | DTXRID802675661 | DTXSID8052726  | Mono-(3-carboxypropyl) phthalate         | 66851-46-5   | PHTHTE_F    | 0.499539            |
| URXMOP      | DTXRID502675662 | DTXSID4052714  | Mono-n-octyl phthalate                   | 5393-19-1    | PHTHTE_F    | 0.021904            |
| URXP04      | DTXRID202675663 | DTXSID2047569  | 2-Hydroxyfluorene                        | 2443-58-5    | PAH_F       | 0.499159            |
| URXP03      | DTXRID902675664 | DTXSID9047540  | 3-Hydroxyfluorene                        | 6344-67-8    | PAH_F       | 0.499818            |
| URXP17      | DTXRID602675665 | DTXSID4052683  | 9-Hydroxyfluorene                        | 1689-64-1    | PAH_F       | 0.499253            |
| URXP06      | DTXRID302675666 | DTXSID90872758 | 1-Hydroxyphenanthrene                    | 2433-56-9    | PAH_F       | 0.499683            |
| URXP07      | DTXRID002675667 | DTXSID8052722  | 2-Hydroxyphenanthrene                    | 605-55-0     | PAH_F       | 0.499147            |
| URXP05      | DTXRID702675668 | DTXSID3052723  | 3-Hydroxyphenanthrene                    | 605-87-8     | PAH_F       | 0.499623            |
| URXP10      | DTXRID402675669 | DTXSID1038298  | 1-Hydroxypyrene                          | 5315-79-7    | PAH_F       | 0.499346            |
| URXP01      | DTXRID702675670 | DTXSID6021793  | 1-Hydroxynaphthalene                     | 90-15-3      | PAH_F       | 0.499626            |
| URXP02      | DTXRID402675671 | DTXSID5027061  | 2-Hydroxynaphthalene                     | 135-19-3     | PAH_F       | 0.499959            |

**Table S3.** Listing of Group C chemicals from NHANES 2009-2010.

| NHANES Code | DSSTox RID      | DSSTox SID     | NHANES Chemical Name                                                 | CASN       | NHANES File | Proportion > Median |
|-------------|-----------------|----------------|----------------------------------------------------------------------|------------|-------------|---------------------|
| URX24D      | DTXRID402675702 | DTXSID0020442  | 2,4-Dichlorophenoxyacetic acid                                       | 94-75-7    | UPHOPM_F    | 0.499183            |
| URX25T      | DTXRID102675703 | DTXSID5021388  | 2,4,5-Trichlorophenoxyacetic acid                                    | 93-76-5    | UPHOPM_F    | 0.001142            |
| URXMAL      | DTXRID802675704 | DTXSID7052739  | Malathion dicarboxylic acid                                          | 1190-28-9  | UPHOPM_F    | 0.170047            |
| URXOXY      | DTXRID502675705 | DTXSID1027502  | 2-Isopropyl-4-methyl-6-hydroxypyrimidine                             | 2814-20-2  | UPHOPM_F    | 0.12162             |
| URXPAR      | DTXRID202675706 | DTXSID0021834  | para-Nitrophenol                                                     | 100-02-7   | UPHOPM_F    | 0.499841            |
| URXCPM      | DTXRID902675707 | DTXSID7038317  | 3,5,6-Trichloro-2-pyridinol                                          | 6515-38-4  | UPHOPM_F    | 0.499782            |
| URXTCC      | DTXRID602675708 | DTXSID9052717  | trans-3-(2,2-Dichlorovinyl)-2,2-dimethylcyclopropane carboxylic acid | 55701-03-6 | UPHOPM_F    | 0.115931            |
| URXCB3      | DTXRID302675709 | DTXSID40873159 | cis-3-(2,2-Dibromovinyl)-2,2-dimethylcyclopropane carboxylic acid    | 53179-78-5 | UPHOPM_F    | 0.012149            |
| URX4FP      | DTXRID602675710 | DTXSID00228005 | 4-Fluoro-3-phenoxybenzoic acid                                       | 77279-89-1 | UPHOPM_F    | 0.042239            |
| URXOPM      | DTXRID302675711 | DTXSID1038321  | 3-Phenoxybenzoic acid                                                | 3739-38-6  | UPHOPM_F    | 0.499127            |
| LBXPFBS     | DTXRID902675690 | DTXSID5030030  | Perfluorobutane sulfonic acid                                        | 375-73-5   | PFC_F       | 0.008512            |
| LBXPFDE     | DTXRID602675691 | DTXSID3031860  | Perfluorodecanoic acid                                               | 335-76-2   | PFC_F       | 0.342616            |
| LBXPFDO     | DTXRID302675692 | DTXSID8031861  | Perfluorododecanoic acid                                             | 307-55-1   | PFC_F       | 0.048056            |
| LBXPFHP     | DTXRID002675693 | DTXSID1037303  | Perfluoroheptanoic acid                                              | 375-85-9   | PFC_F       | 0.205618            |
| LBXPFHS     | DTXRID702675694 | DTXSID7040150  | Perfluorohexane sulfonic acid                                        | 355-46-4   | PFC_F       | 0.4889              |
| LBXPFNA     | DTXRID402675695 | DTXSID8031863  | Perfluorononanoic acid                                               | 375-95-1   | PFC_F       | 0.467424            |
| LBXPFQA     | DTXRID102675696 | DTXSID8031865  | Perfluorooctanoic acid                                               | 335-67-1   | PFC_F       | 0.485585            |
| LBXPFOS     | DTXRID802675697 | DTXSID3031864  | Perfluorooctane sulfonic acid                                        | 1763-23-1  | PFC_F       | 0.499721            |
| LBXPFSA     | DTXRID502675698 | DTXSID3038939  | Perfluorooctane sulfonamide                                          | 754-91-6   | PFC_F       | 0.000615            |
| LBXEPAH     | DTXRID202675699 | DTXSID5062760  | 2-(N-Ethyl-perfluorooctane sulfonamido) acetic acid                  | 2991-50-6  | PFC_F       | 0.052624            |
| LBXMPAH     | DTXRID002675700 | DTXSID10624392 | 2-(N-Methyl-perfluorooctane sulfonamido) acetic acid                 | 2355-31-9  | PFC_F       | 0.420071            |
| LBXPFUA     | DTXRID702675701 | DTXSID8047553  | Perfluoroundecanoic acid                                             | 2058-94-8  | PFC_F       | 0.306954            |
| URXMU1      | DTXRID102675672 | DTXSID70221063 | 1-Methyluric acid                                                    | 708-79-2   | CAFE_F      | 0.499746            |
| URXMU2      | DTXRID802675673 | DTXSID50209243 | 3-Methyluric acid                                                    | 605-99-2   | CAFE_F      | 0.499944            |
| URXMU3      | DTXRID502675674 | DTXSID40210106 | 7-Methyluric acid                                                    | 612-37-3   | CAFE_F      | 0.499673            |
| URXMU4      | DTXRID202675675 | DTXSID50241466 | 1,3-Dimethyluric acid                                                | 944-73-0   | CAFE_F      | 0.499226            |
| URXMU5      | DTXRID902675676 | DTXSID30187499 | 1,7-Dimethyluric acid                                                | 33868-03-0 | CAFE_F      | 0.499427            |
| URXMU6      | DTXRID602675677 | DTXSID10156769 | 3,7-Dimethyluric acid                                                | 13087-49-5 | CAFE_F      | 0.499352            |
| URXMU7      | DTXRID302675678 | DTXSID50202496 | 1,3,7-Trimethyluric acid                                             | 5415-44-1  | CAFE_F      | 0.499264            |

|        |                 |                |                                      |            |        |          |
|--------|-----------------|----------------|--------------------------------------|------------|--------|----------|
| URXMX1 | DTXRID002675679 | DTXSID30210271 | 1-Methylxanthine                     | 6136-37-4  | CAFE_F | 0.499538 |
| URXMX2 | DTXRID302675680 | DTXSID90148107 | 3-Methylxanthine                     | 1076-22-8  | CAFE_F | 0.499002 |
| URXMX3 | DTXRID002675681 | DTXSID60203696 | 7-Methylxanthine                     | 552-62-5   | CAFE_F | 0.499956 |
| URXMX4 | DTXRID702675682 | DTXSID5021336  | 1,3-Dimethylxanthine                 | 58-55-9    | CAFE_F | 0.499835 |
| URXMX5 | DTXRID402675683 | DTXSID2052281  | 1,7-Dimethylxanthine                 | 611-59-6   | CAFE_F | 0.499834 |
| URXMX6 | DTXRID102675684 | DTXSID9026132  | 3,7-Dimethylxanthine                 | 83-67-0    | CAFE_F | 0.499745 |
| URXMX7 | DTXRID802675685 | DTXSID0020232  | 1,3,7-Trimethylxanthine              | 58-08-2    | CAFE_F | 0.49957  |
| URXAMU | DTXRID502675686 | DTXSID20173669 | AAMU                                 | 19893-78-8 | CAFE_F | 0.499327 |
| URXDEE | DTXRID202675687 | DTXSID2021995  | N,N-diethyl-meta-toluamide           | 134-62-3   | DEET_F | 0.033173 |
| URXDEA | DTXRID902675688 | DTXSID30222551 | 3-diethyl-carbamoyl benzoic acid     | 72236-23-8 | DEET_F | 0.499823 |
| URXDHD | DTXRID602675689 | DTXSID70222550 | N,N-diethyl-3-hydroxymethylbenzamide | 72236-22-7 | DEET_F | 0.170411 |

**Description of Tables S4 through S6.** Tables S4, S5, and S6 provide information about concordance percentages obtained between sets of prevalent combinations obtained using the entire subsample A, B, or C, respectively, from NHANES 2009-2010 or partitions the subsample. Row names indicate the first set of prevalent combinations ( $C_i$ ) considered in computing the concordance percentage. For example, “A/30%” indicates the set of prevalent combinations obtained when applying FIM to all of subsample A using a minimum prevalence level of 30% and “A:P2/30%” indicates the set of prevalent combinations obtained when applying FIM to just the second partition of subsample A using a minimum prevalence level of 30%. Column names indicate the second set of prevalent combination ( $C_j$ ) considered in computing the concordance percentage. These are named using the same convention.

**Table S4.** Listing of concordance percentages between sets of prevalent combinations obtained using the entire subsample A from NHANES 2009-2010 or partitions thereof.

|          | A/30% | A:P1/30% | A:P2/30% | A:P3/30% | A:P4/30% | A/28% | A:P1/28% | A:P2/28% | A:P3/28% | A:P4/28% |
|----------|-------|----------|----------|----------|----------|-------|----------|----------|----------|----------|
| A/30%    | 1.000 | 0.903    | 0.839    | 0.742    | 0.903    | 1.000 | 1.000    | 1.000    | 0.968    | 1.000    |
| A:P1/30% | 0.903 | 1.000    | 0.839    | 0.710    | 0.839    | 1.000 | 1.000    | 1.000    | 0.935    | 0.968    |
| A:P2/30% | 0.722 | 0.722    | 1.000    | 0.639    | 0.667    | 1.000 | 0.889    | 1.000    | 0.861    | 0.972    |
| A:P3/30% | 0.767 | 0.733    | 0.767    | 1.000    | 0.767    | 0.933 | 0.833    | 0.933    | 1.000    | 0.933    |
| A:P4/30% | 0.757 | 0.703    | 0.649    | 0.622    | 1.000    | 1.000 | 0.892    | 0.919    | 0.865    | 1.000    |

**Table S5.** Listing of concordance percentages between sets of prevalent combinations obtained using the entire subsample B from NHANES 2009-2010 or partitions thereof.

|          | B/33% | B:P1/33% | B:P2/33% | B:P3/33% | B:P4/33% | B/31% | B:P1/31% | B:P2/31% | B:P3/31% | B:P4/31% |
|----------|-------|----------|----------|----------|----------|-------|----------|----------|----------|----------|
| B/33%    | 1.000 | 0.933    | 0.883    | 0.967    | 0.950    | 1.000 | 1.000    | 0.983    | 1.000    | 1.000    |
| B:P1/33% | 0.949 | 1.000    | 0.847    | 0.949    | 0.949    | 1.000 | 1.000    | 0.983    | 1.000    | 1.000    |
| B:P2/33% | 0.869 | 0.820    | 1.000    | 0.836    | 0.852    | 1.000 | 0.934    | 1.000    | 0.951    | 0.951    |
| B:P3/33% | 0.921 | 0.889    | 0.810    | 1.000    | 0.905    | 1.000 | 1.000    | 0.968    | 1.000    | 0.984    |
| B:P4/33% | 0.934 | 0.918    | 0.852    | 0.934    | 1.000    | 0.984 | 0.984    | 0.984    | 0.984    | 1.000    |

**Table S6.** Listing of concordance percentages between sets of prevalent combinations obtained using the entire subsample C from NHANES 2009-2010 or partitions thereof.

|          | C/40% | C:P1/40% | C:P2/40% | C:P3/40% | C:P4/40% | C/38% | C:P1/38% | C:P2/38% | C:P3/38% | C:P4/38% |
|----------|-------|----------|----------|----------|----------|-------|----------|----------|----------|----------|
| C/40%    | 1.000 | 0.806    | 0.935    | 0.855    | 0.855    | 1.000 | 1.000    | 1.000    | 0.984    | 1.000    |
| C:P1/40% | 0.926 | 1.000    | 0.889    | 0.907    | 0.833    | 1.000 | 1.000    | 0.963    | 0.981    | 0.981    |
| C:P2/40% | 0.866 | 0.716    | 1.000    | 0.746    | 0.806    | 0.970 | 0.955    | 1.000    | 0.940    | 0.985    |
| C:P3/40% | 0.964 | 0.891    | 0.909    | 1.000    | 0.873    | 1.000 | 1.000    | 1.000    | 1.000    | 1.000    |
| C:P4/40% | 0.898 | 0.763    | 0.915    | 0.814    | 1.000    | 0.983 | 0.966    | 1.000    | 0.949    | 1.000    |

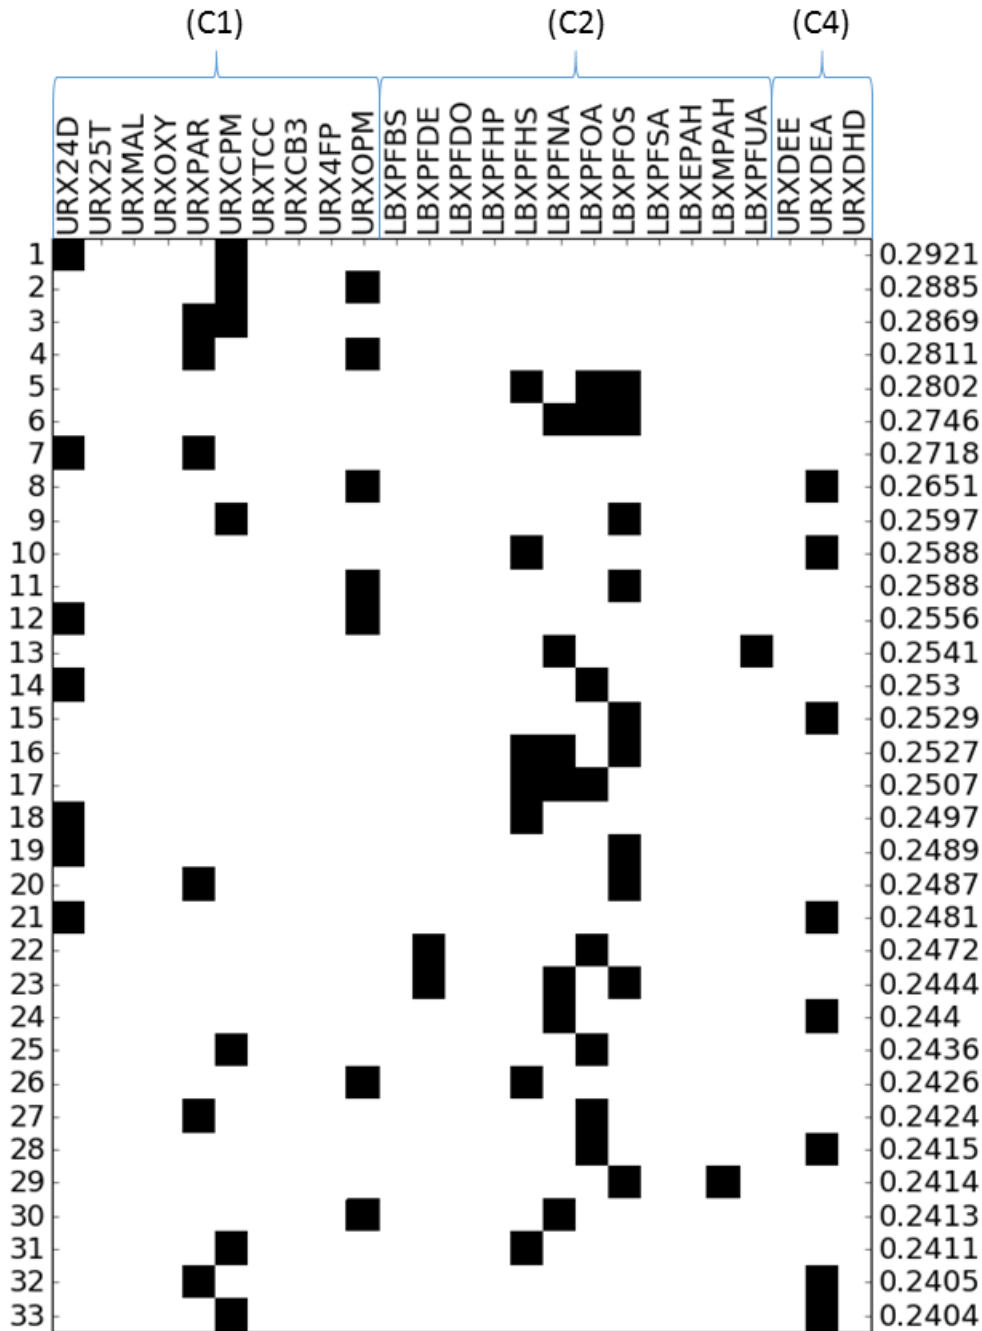

**Figure S1.** Presence-absence map (black indicates present) illustrating 33 maximal prevalent combinations of Group C chemicals from subgroups C1, C2, and C4 (cf. Section 2.1.1 of manuscript). The maximal prevalent combinations were identified by omitting Subgroup C3 chemicals from consideration and then applying FIM with discretization thresholds set at the 50<sup>th</sup> percentiles and a minimum prevalence level of 24%. NHANES codes along the top of the figure indicate Group C chemicals, and these are organized into subgroups C1, C2, and C4. (Note that subgroup C3 has been omitted.) The observed prevalence number at the right of each row indicates the proportion of US residents in which the given combination was observed to occur.



## REFERENCES

US Environmental Protection Agency. 2016a. Distributed structure-searchable toxicity (dsstox) database. Available: <https://www.epa.gov/chemical-research/distributed-structure-searchable-toxicity-dsstox-database> [accessed 8 September 2016].

US Environmental Protection Agency. 2016b. Comptox dashboard. Available: <https://comptox.epa.gov/dashboard> [accessed 8 September 2016].
